# Supplementary material for: Coordination polymers constructed from bis-pyridyl-bis-amides and 1,4,5,8-naphthalenetetracarboxylic acid: ligand transformation and metal ion sensing
Source: Royal Society of Chemistry journal article supplement (doi:10.1039/d4ce01119h), 2024-12-26

## Supplementary Materials

### **Coordination Polymers Constructed from Bis-pyridyl-bis-amide and 1,4,5,8-Naphthalenetetracarboxylic Acid: Ligand Transformation and Metal Sensing**

Wei-Hao Chen,<sup>1</sup> Yan-Xin Chen,<sup>1</sup> Kedar Bahadur Thapa,<sup>2</sup> Shih-Miao Liu<sup>3\*</sup> and Jhy-Der Chen<sup>1\*</sup>

<sup>1</sup>*Department of Chemistry, Chung Yuan Christian University, Chung-Li, Taiwan, R.O.C. E-mail: jdchen@cycu.edu.tw*

<sup>2</sup>*Makawanpur Multiple Campus, affiliated to Tribhuvan University, Municipality Rd, Hetauda, Nepal*

<sup>3</sup>*Center for General Education, Hsin Sheng Junior College of Medical Care and Management, Longtan, Taiwan, R.O.C. E-mail: lsm0301@hsc.edu.tw*

**Fig. S1.** PXRD patterns of complex **1**.

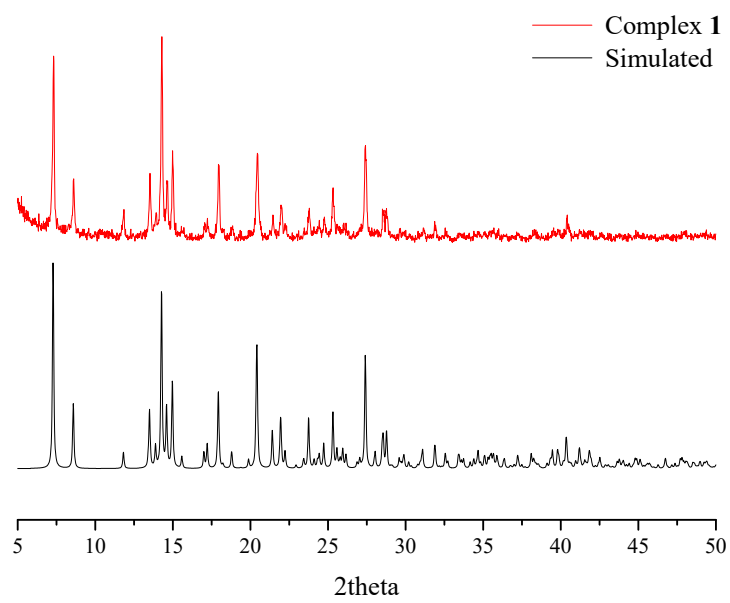

**Fig. S2.** PXRD patterns of complex **2**.

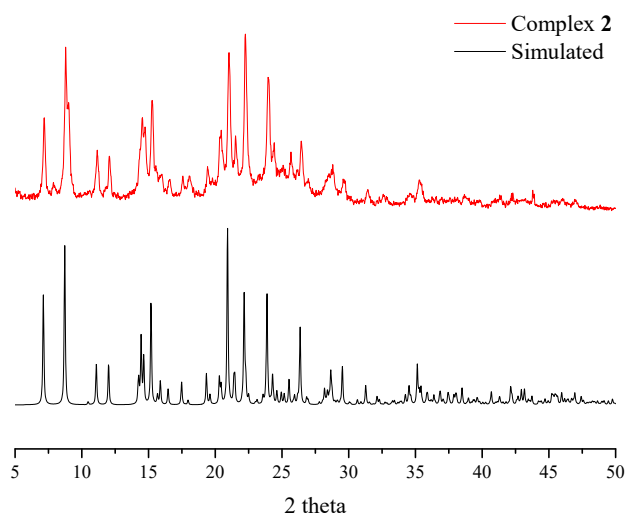

**Fig. S3.** PXRD patterns of complex **3**.

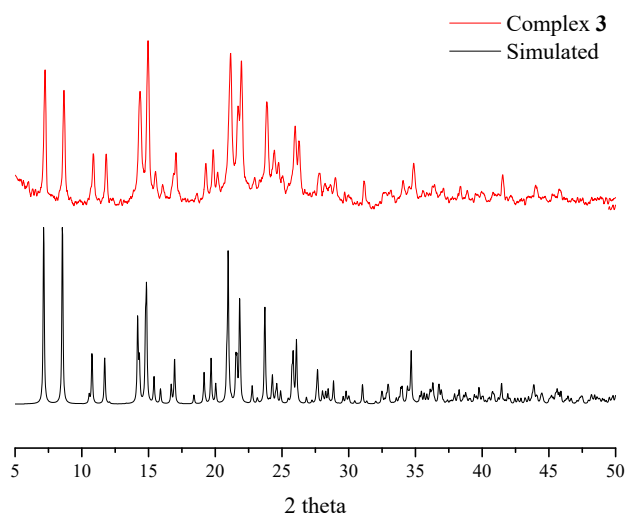

**Fig. S4.** PXRD patterns of complex **4**.

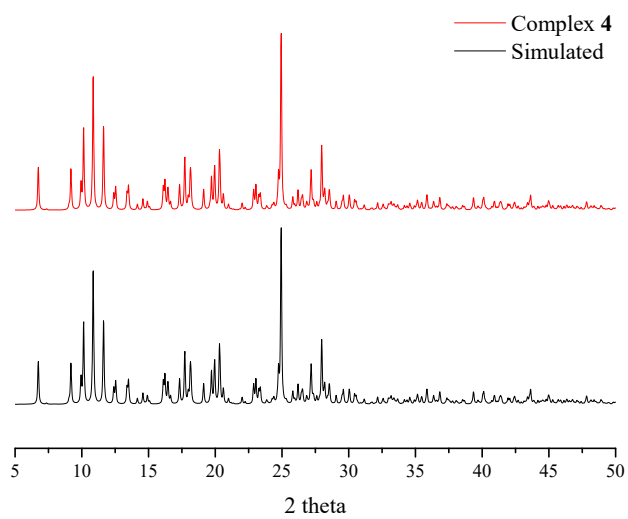

**Fig. S5.** PXRD patterns of complex **5a**.

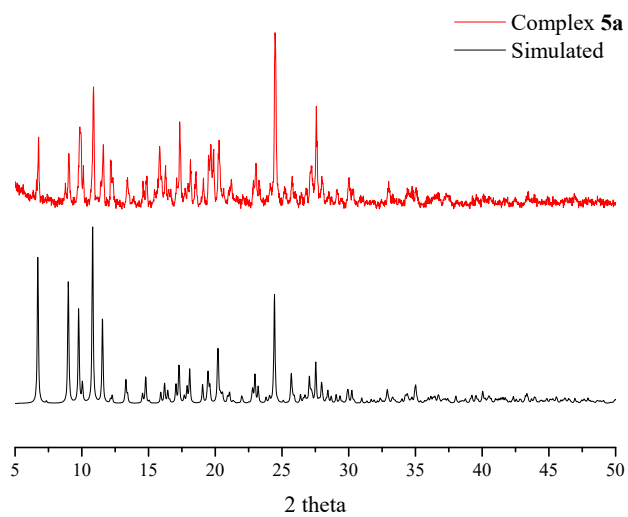

**Fig. S6.** PXRD patterns of complex **5b**.

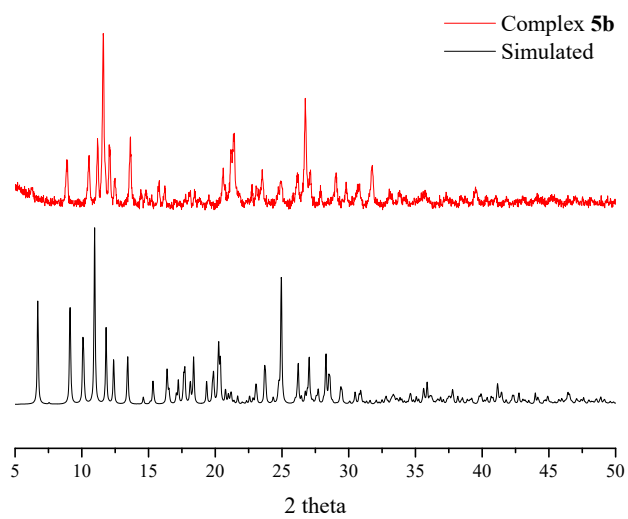

**Fig. S7.** PXRD patterns of complex **6**.

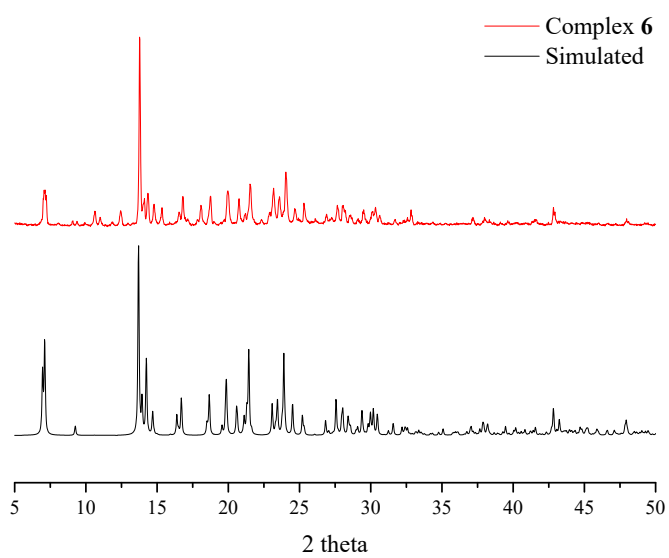



**Fig. S8.** PXRD patterns of complex 7.

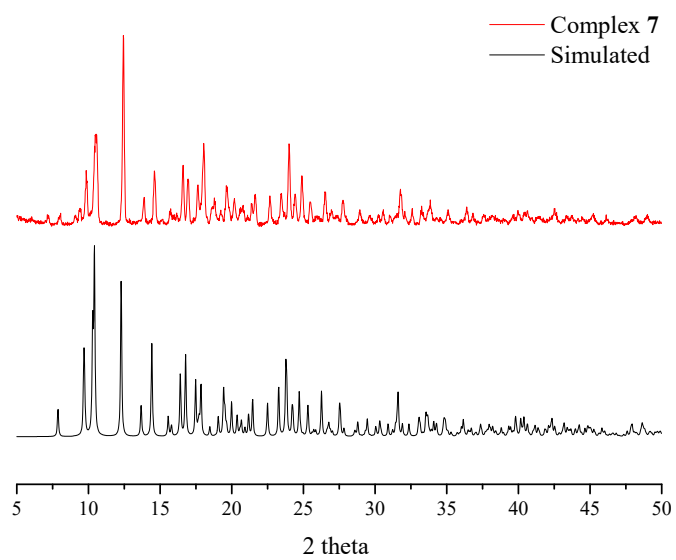

**Fig. S9.** TGA curve of complex 1.

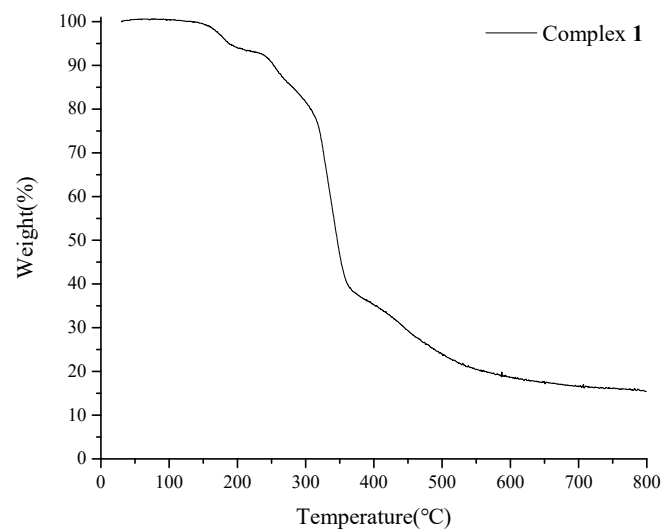

**Fig. S10.** TGA curve of complex **2**.

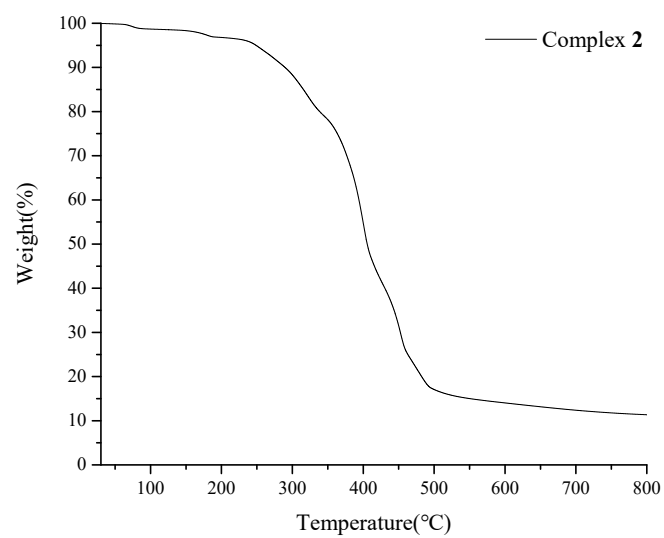

**Fig. S11.** TGA curve of complex **3**.

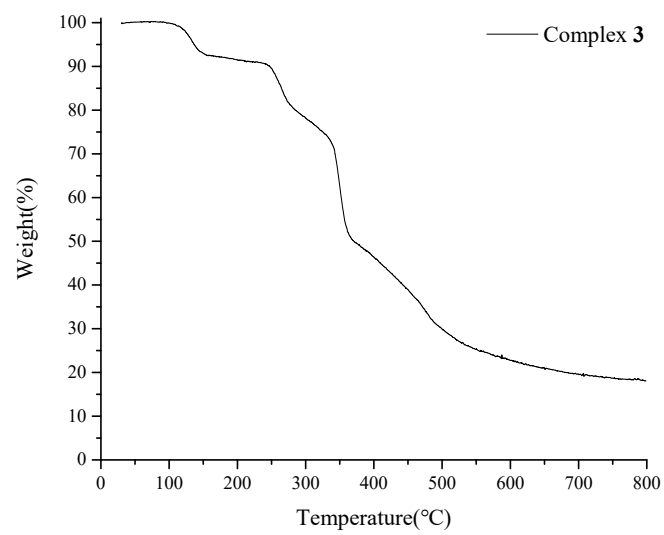

**Fig. S12.** TGA curve of complex 4.

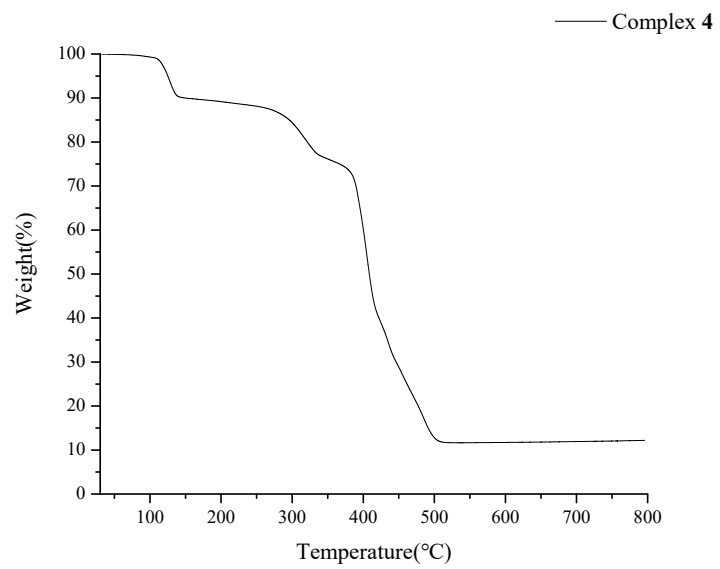

**Fig. S13.** TGA curve of complex **5a**.

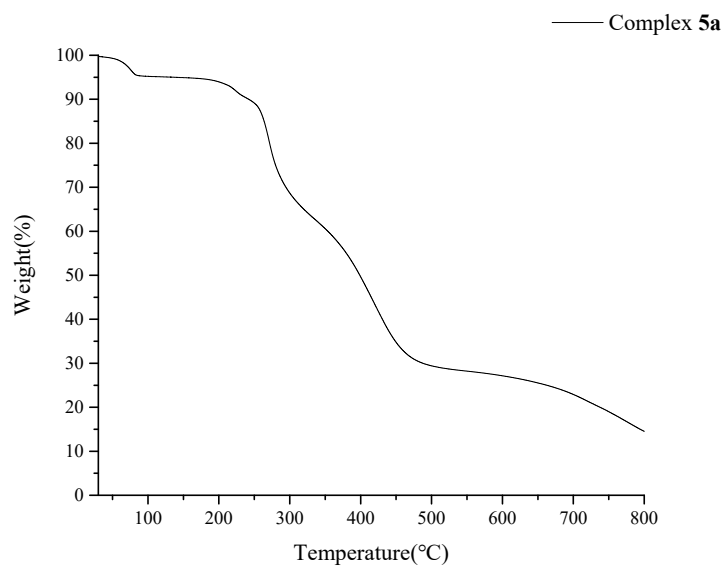

**Fig. S14.** TGA curve of complex **5b**.

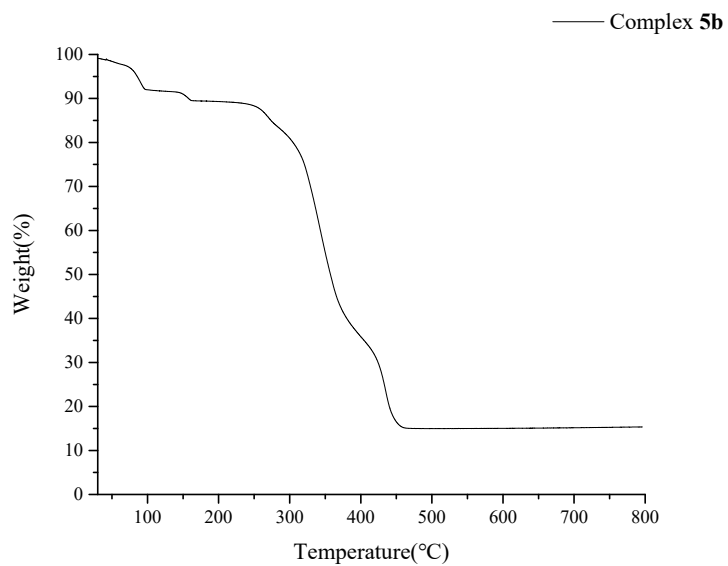

**Fig. S15.** TGA curve of complex **6**.

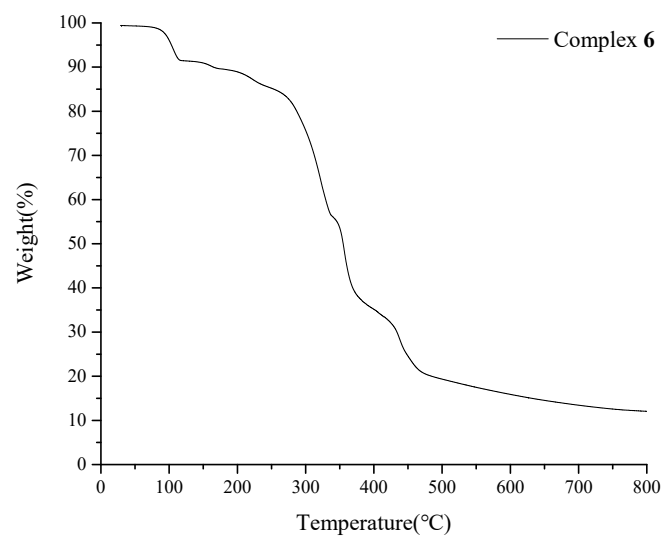



**Fig. S16.** TGA curve of complex 7.

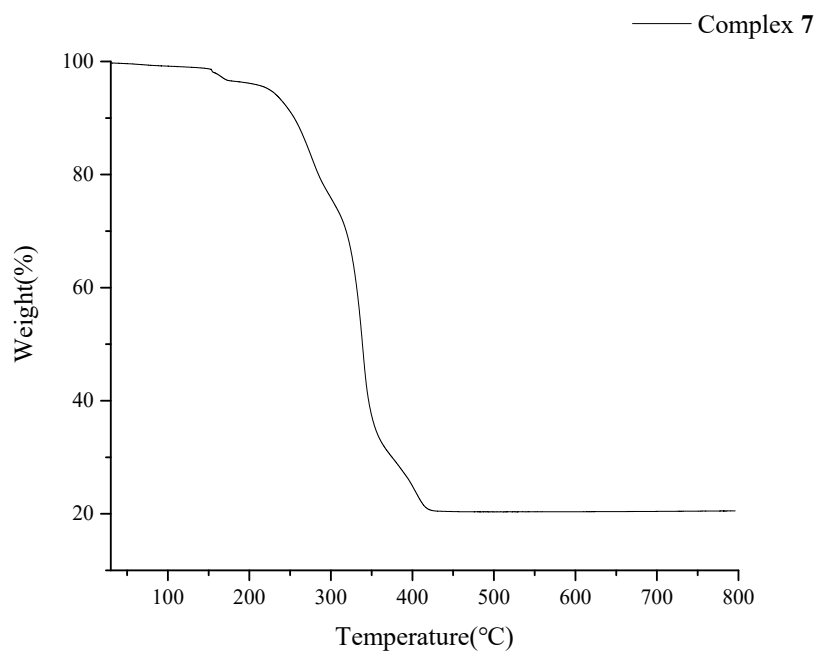

**Fig. S17.** PXRD patterns of complex 1 in different solvents

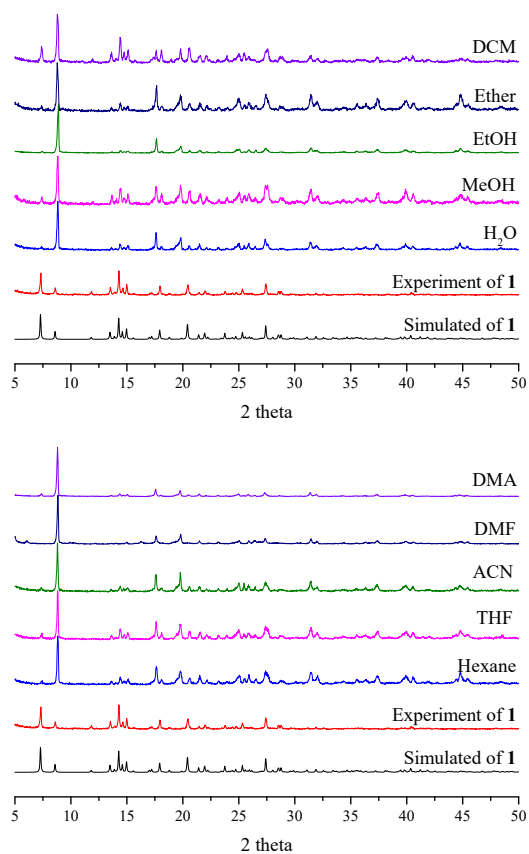

**Fig. S18.** PXRD patterns of complex 2 in different solvents

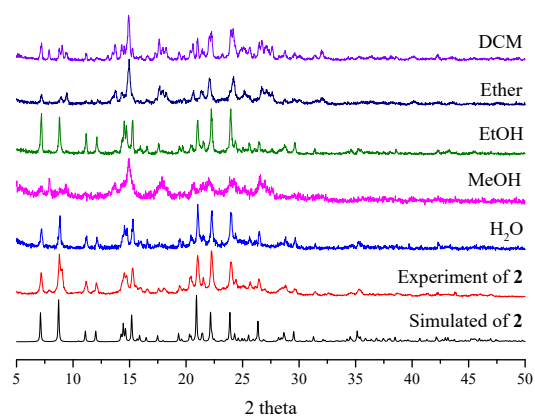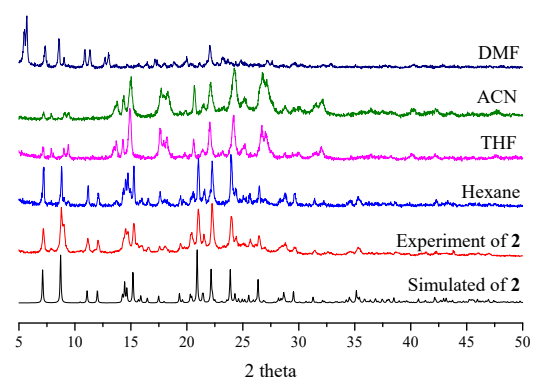

**Fig. S19.** PXRD patterns of complex 3 in different solvents

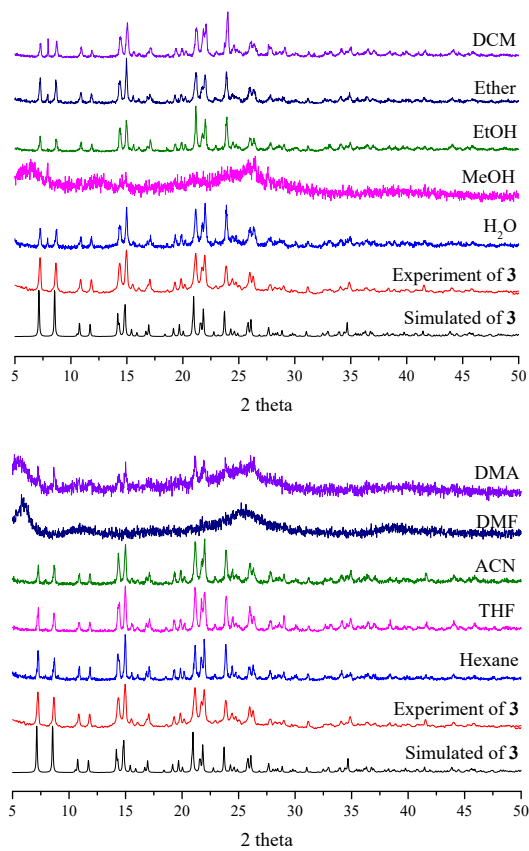

**Fig. S20.** PXRD patterns of complex **6** in different solvents

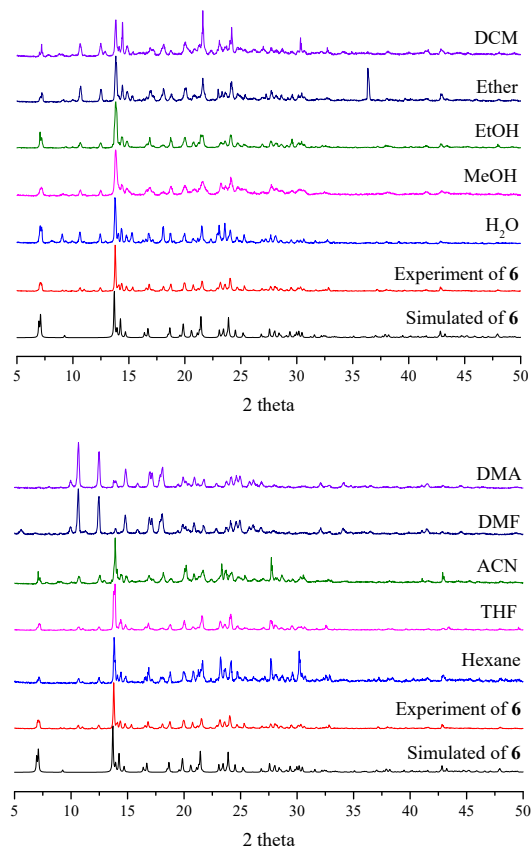

**Fig. S21.** PXRD patterns of complex 7 in different solvents

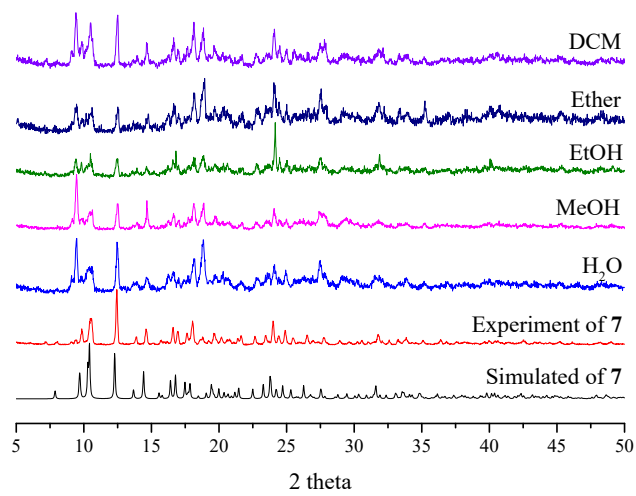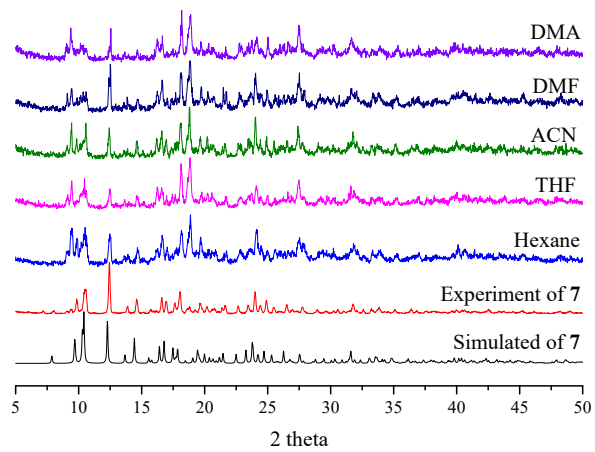

**Fig. S22.** The emission and excitation spectra of L<sup>1</sup> and L<sup>2</sup>.

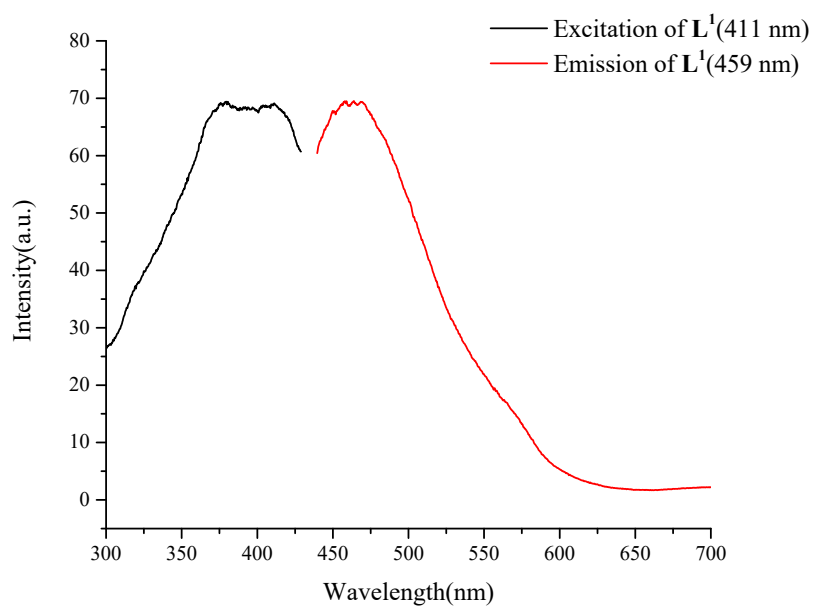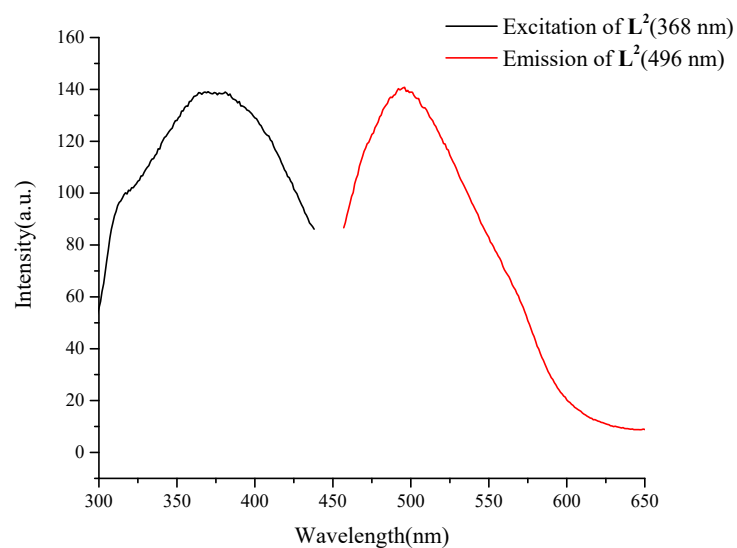

**Fig. S23.** The emission and excitation spectra of  $L^4$  and  $H_4$ NTC.

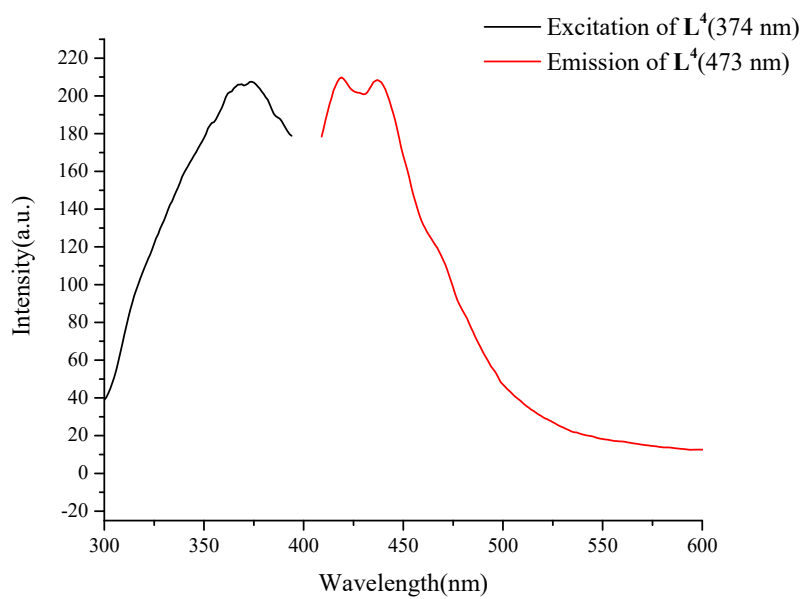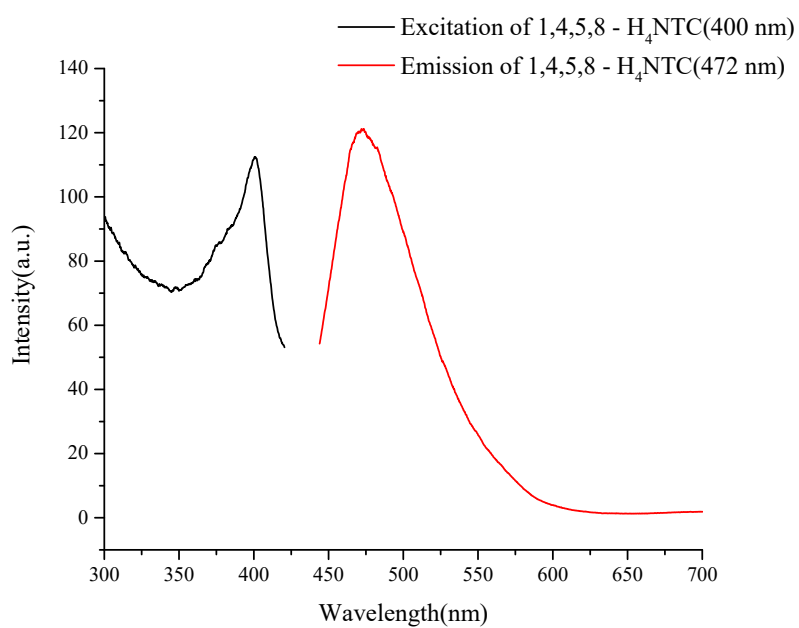

**Fig. S24.** The emission and excitation spectra of complexes **1** and **2**.



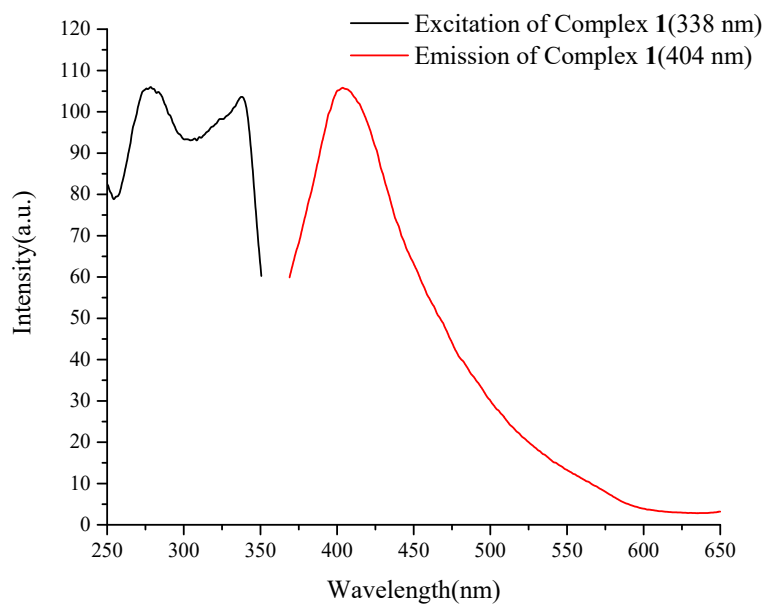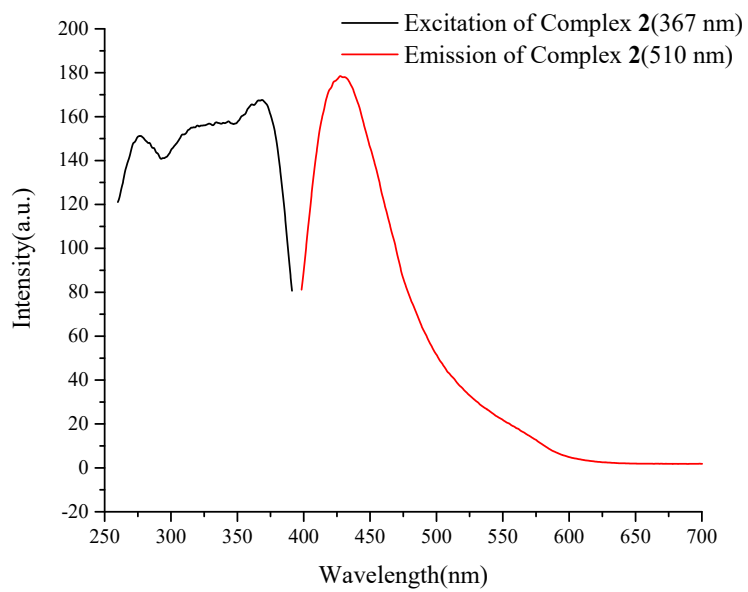

**Fig. S25.** The emission and excitation spectra of complexes **3** and **6**.

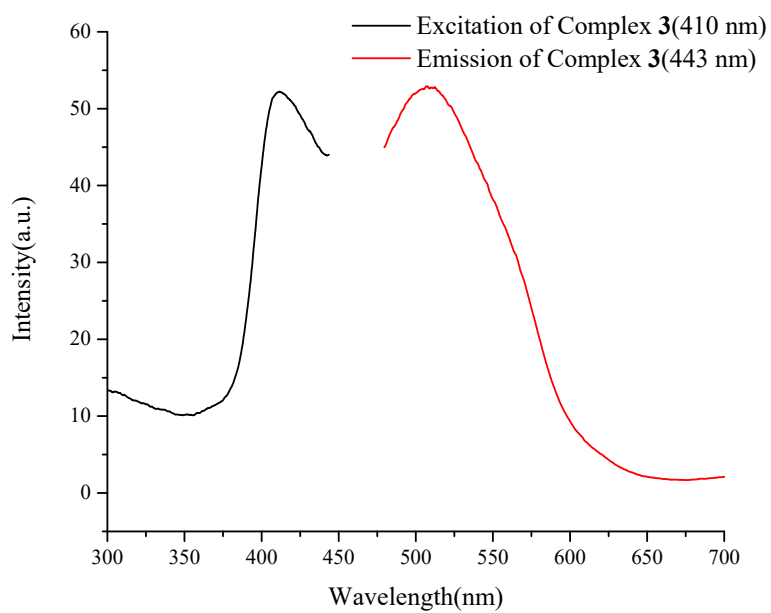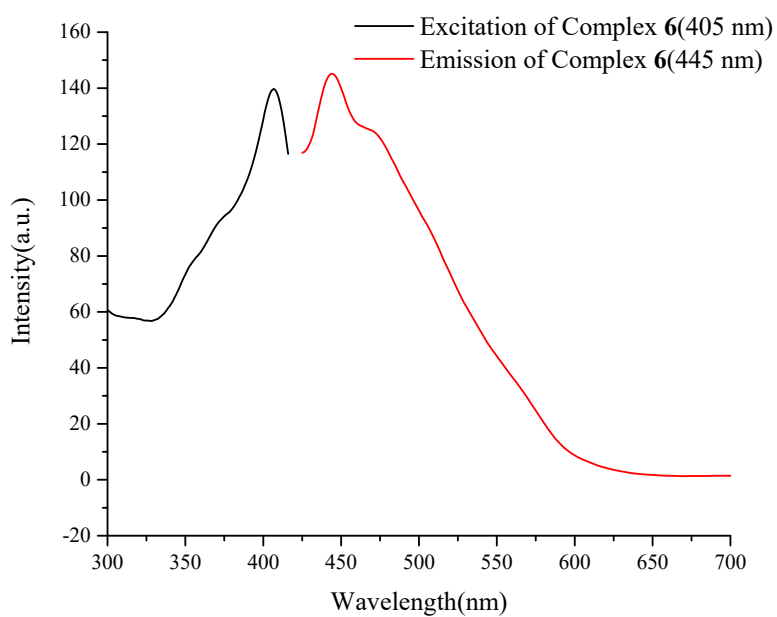

**Fig. S26.** The emission and excitation spectra of complex 7.

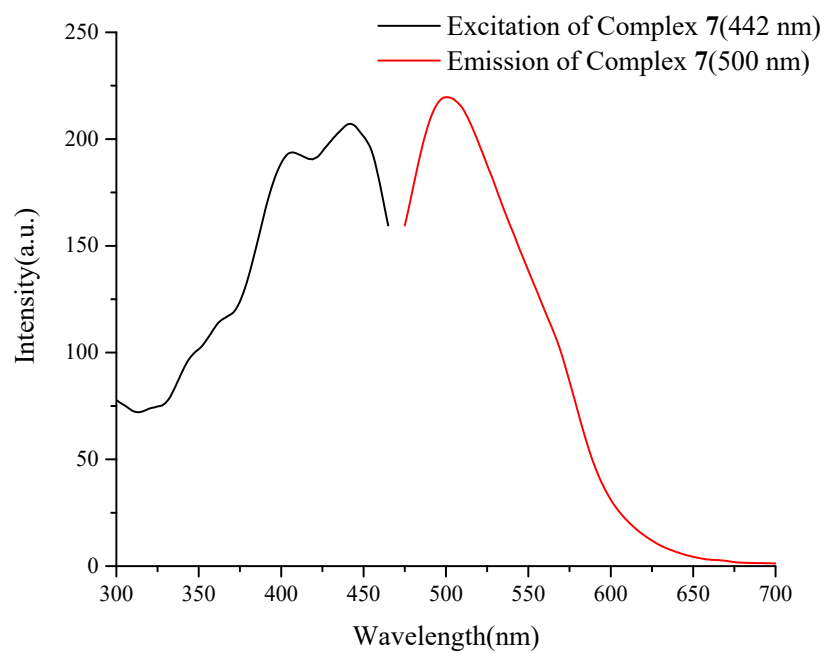

**Fig. S27.** Emission spectra and the bar charts showing the percentages of quenching of complex **1** for triplicate experiments.

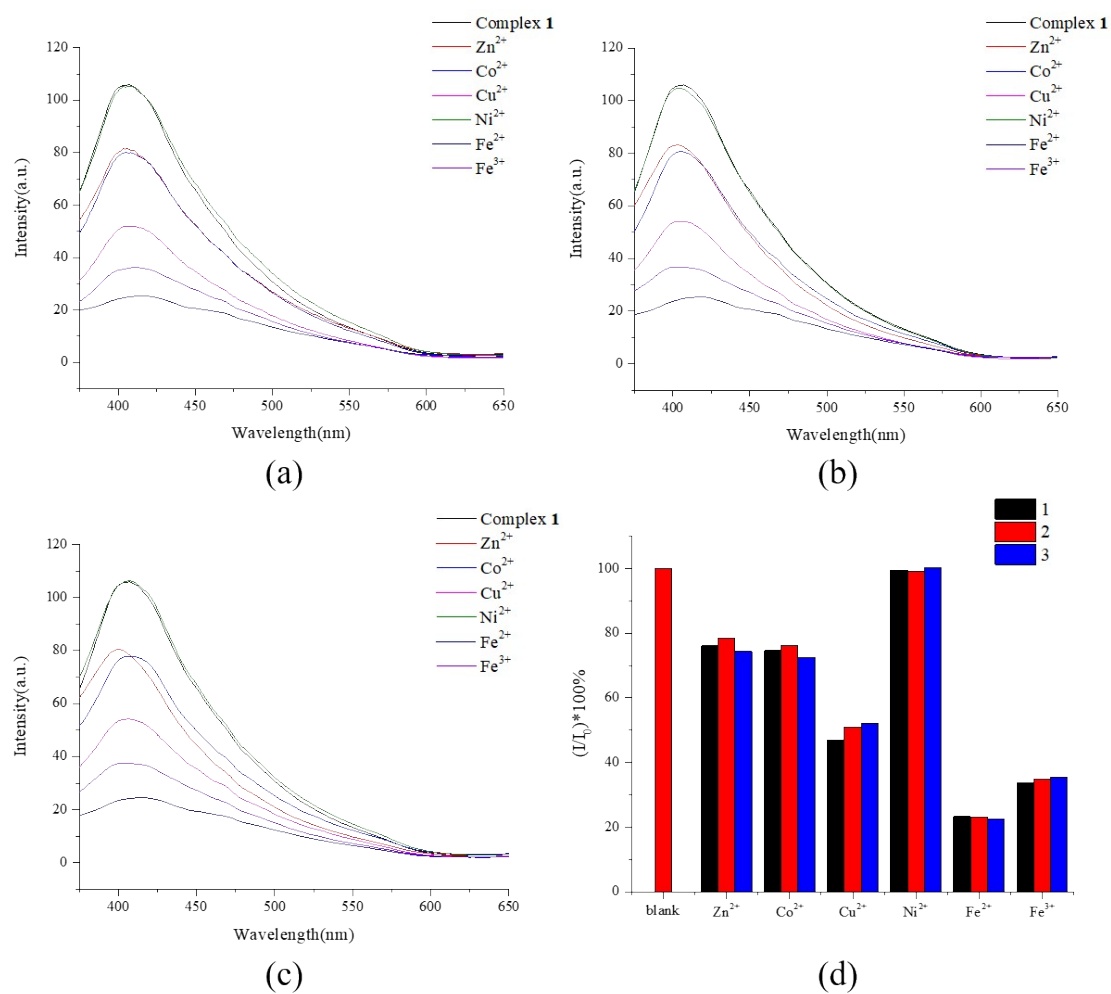

**Fig. S28.** Emission spectra and the bar charts showing the percentages of quenching of complex 2 for triplicate experiments.

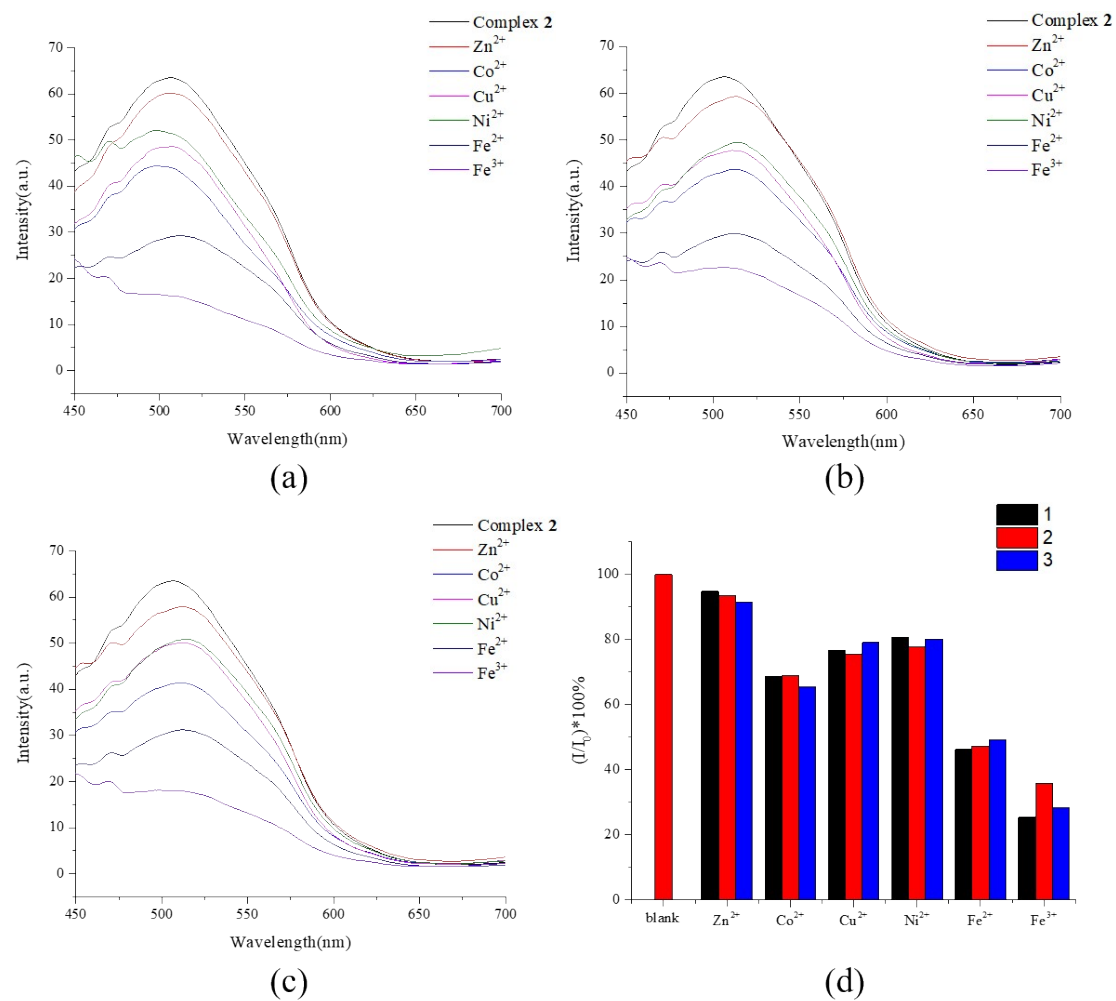

**Fig. S29.** Emission spectra and the bar charts showing the percentages of quenching of complex 3 for triplicate experiments.

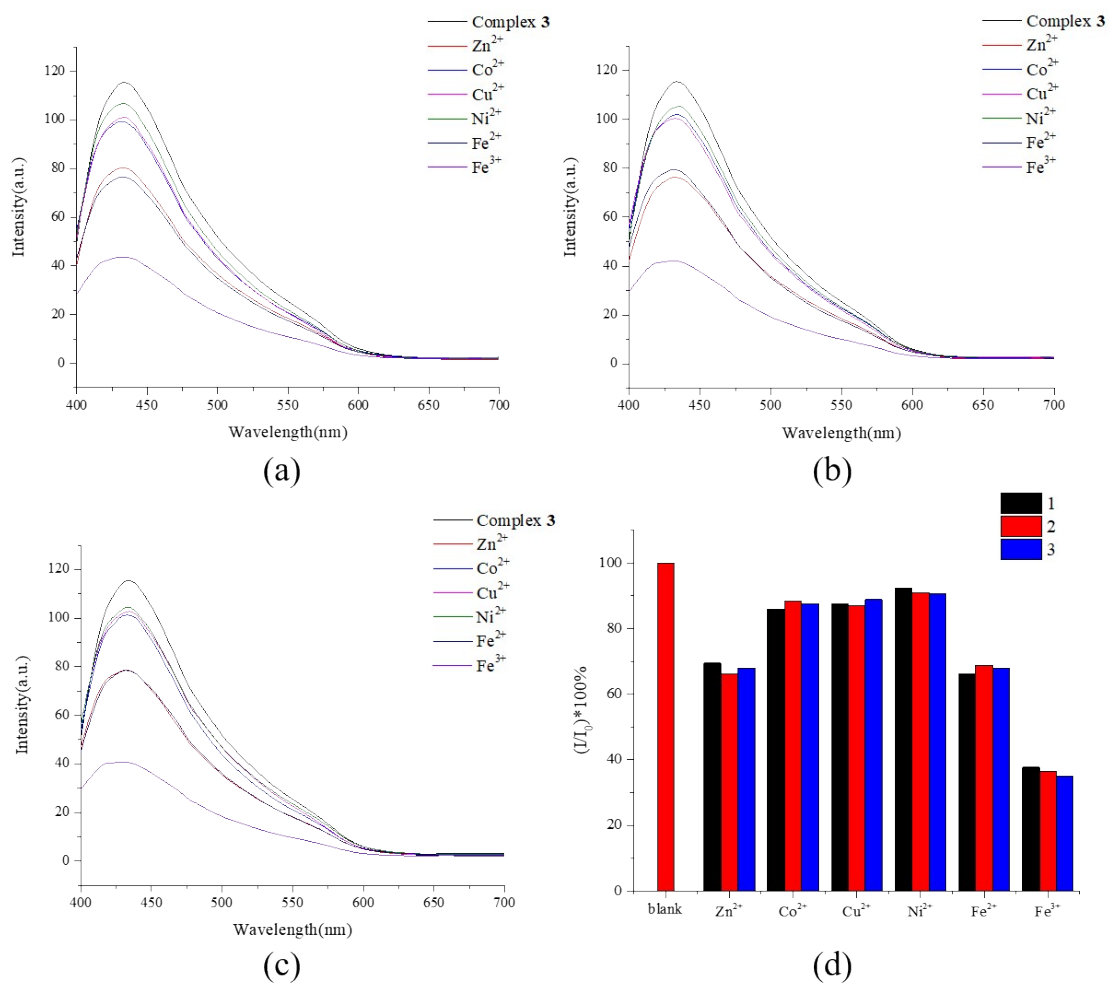

**Fig. S30.** Emission spectra and the bar charts showing the percentages of quenching of complex 6 for triplicate experiments.

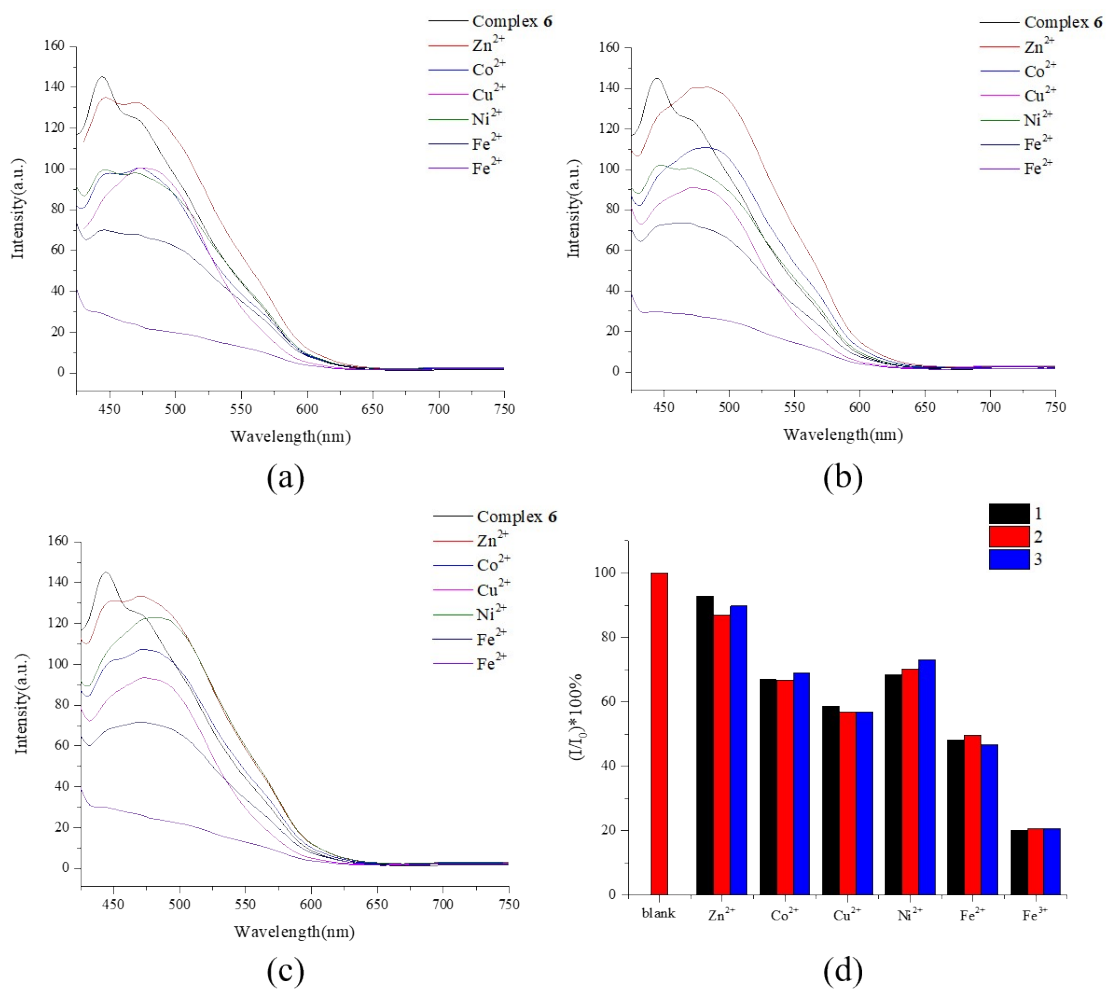

**Fig. S31.** Emission spectra and the bar charts showing the percentages of quenching of complex 7 for triplicate experiments.

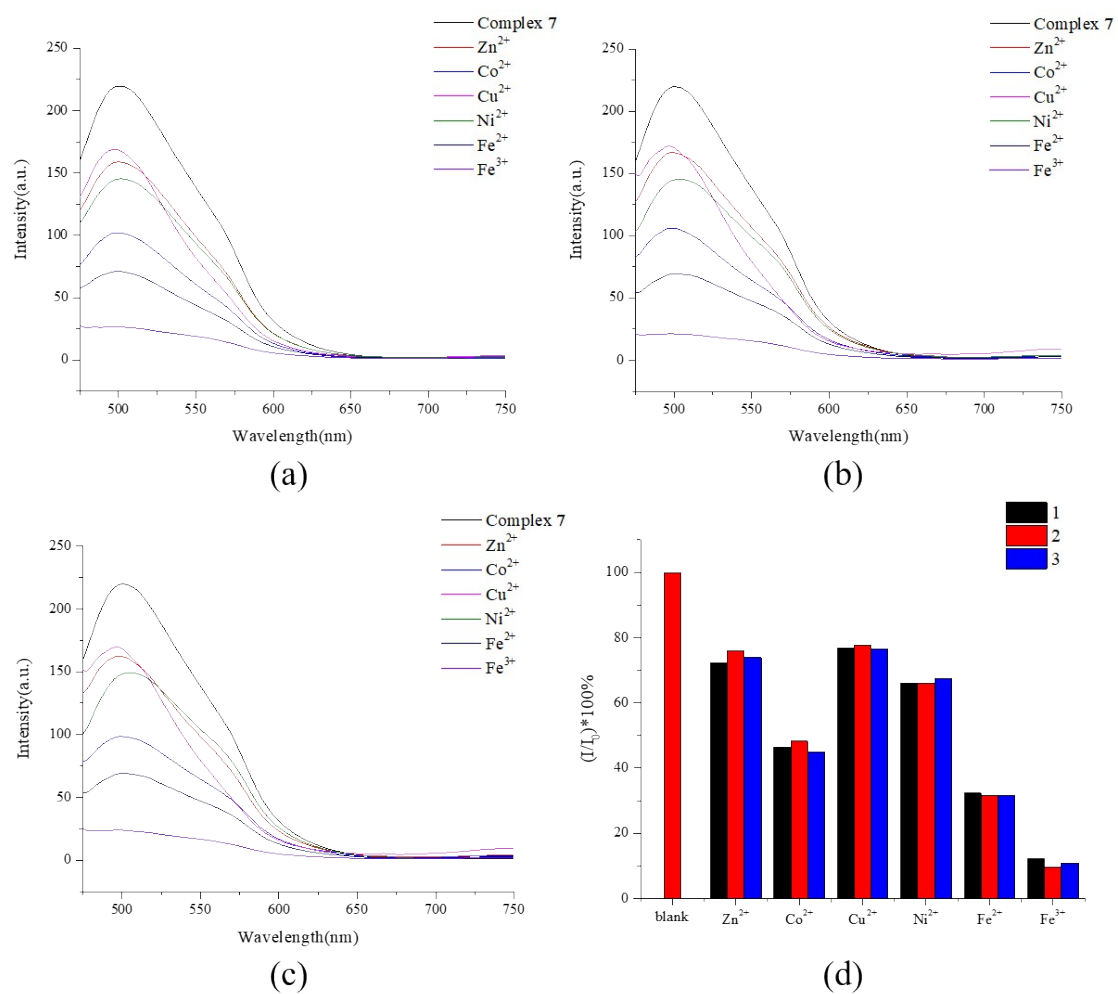

**Fig. S32.** PXRD patterns of complex 7 in different cationic solutions.



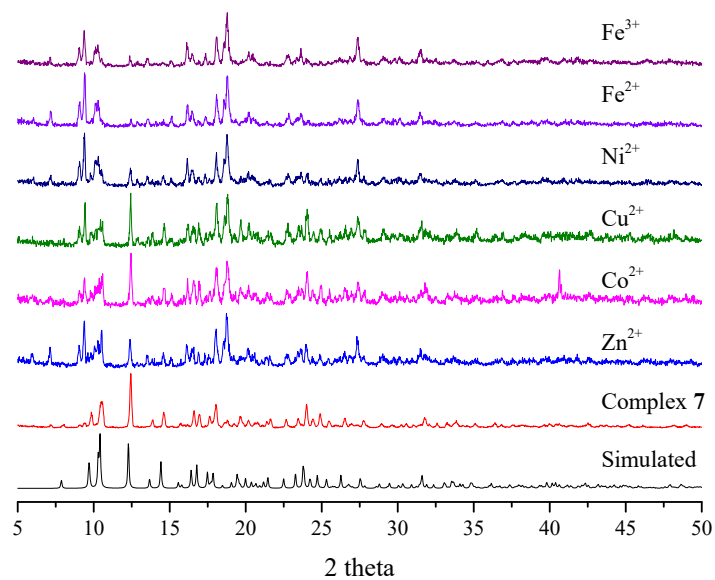

**Fig. S33.** A drawing showing the overlap of the excitation spectrum of complex 7 and the UV-vis spectrum of Fe<sup>3+</sup>.

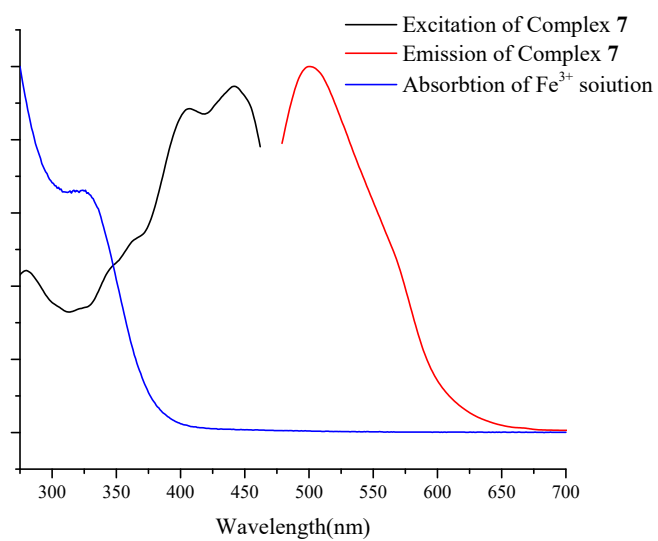

**Fig. S34.** The EDX data of complex **7** in Fe<sup>3+</sup>.

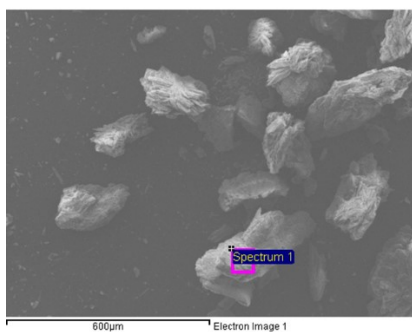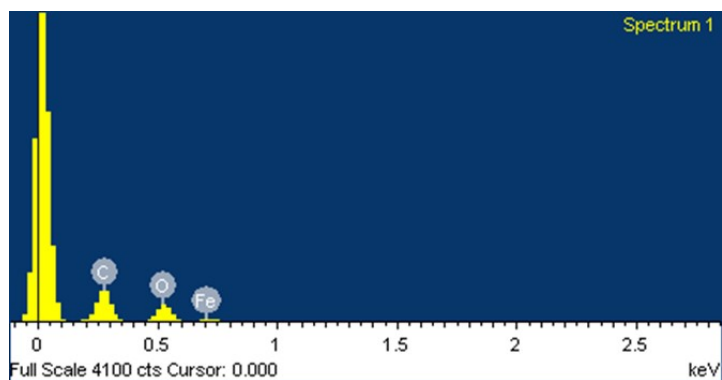

The element percentage analysis of point scan.

| Element | Weight% | Atomic% |
|---------|---------|---------|
| C K     | 43.13   | 60.46   |
| O K     | 31.57   | 33.23   |
| Fe L    | 16.60   | 5.00    |
| Cd L    | 8.70    | 1.30    |
| Totals  | 100.00  | 100.00  |

**Fig. S35.** IR spectra of complex **7** before and after immersion in  $\text{Fe}^{3+}$ .

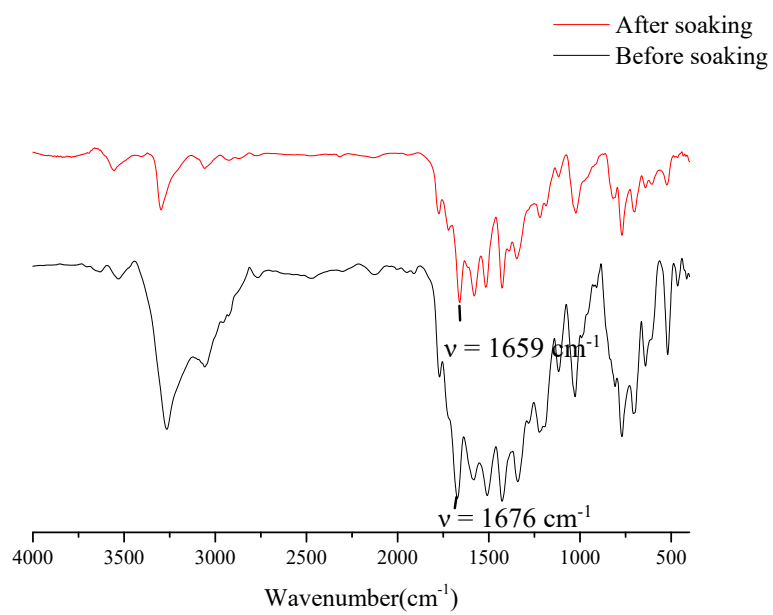

**Fig. S36.** Full XPS spectra of complex 7.

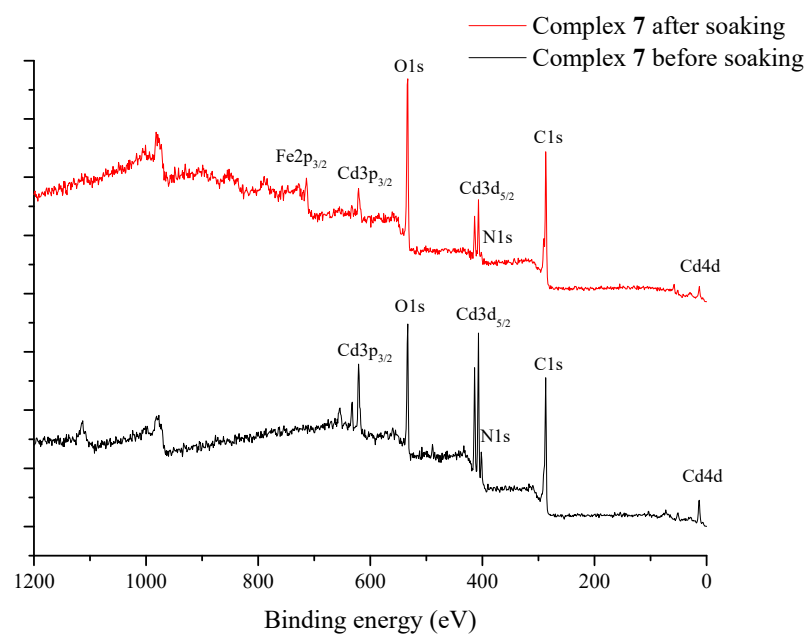

**Fig. S37.** Binding energies fitting analysis for O1s electrons of complex 7 (a) before and (b) after immersing in Fe<sup>3+</sup>.

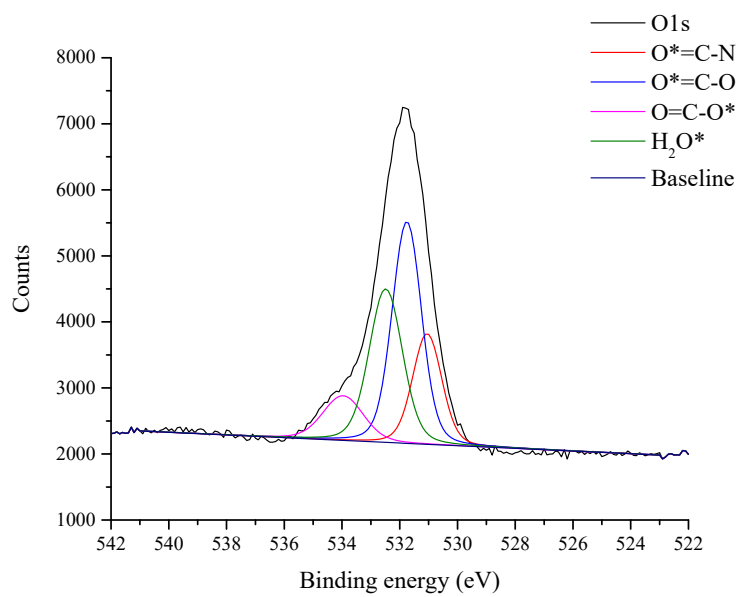

(a)

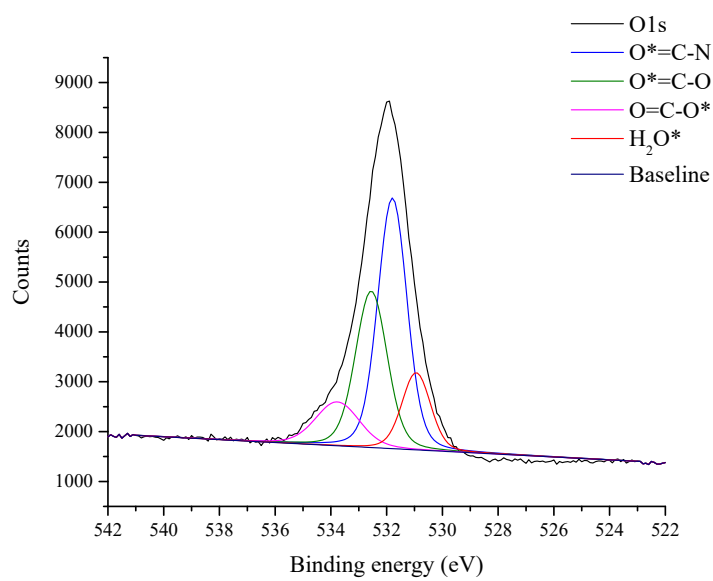

(b)

**Fig. S38.** The emission spectra of complex **7** in Fe<sup>3+</sup> with different concentrations.

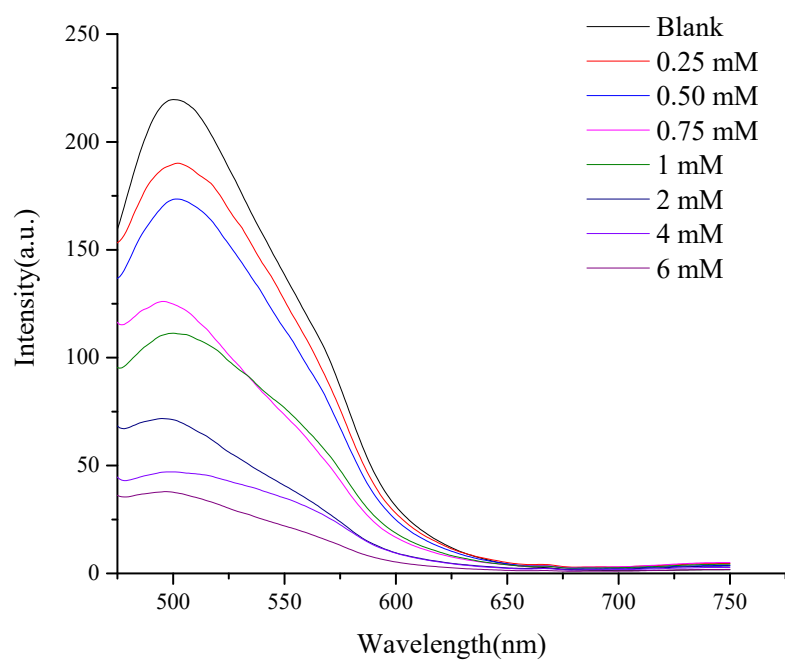

**Fig. S39.** PXRD patterns of complex 7 in Fe<sup>3+</sup> solution for five cycles.

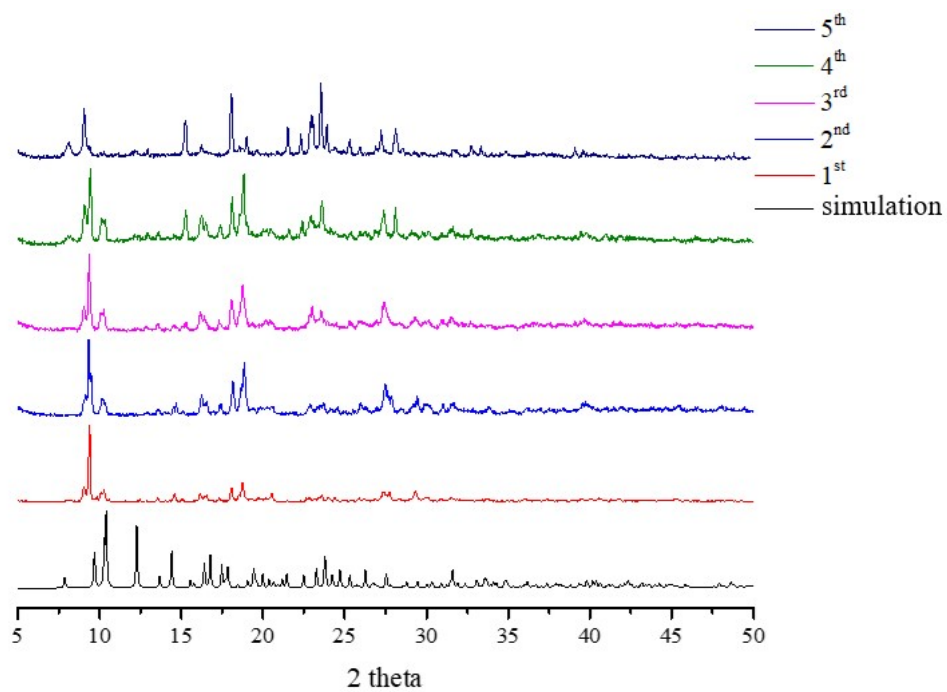

**Fig. S40.** N<sub>2</sub> adsorption–desorption isotherms for complex 1.



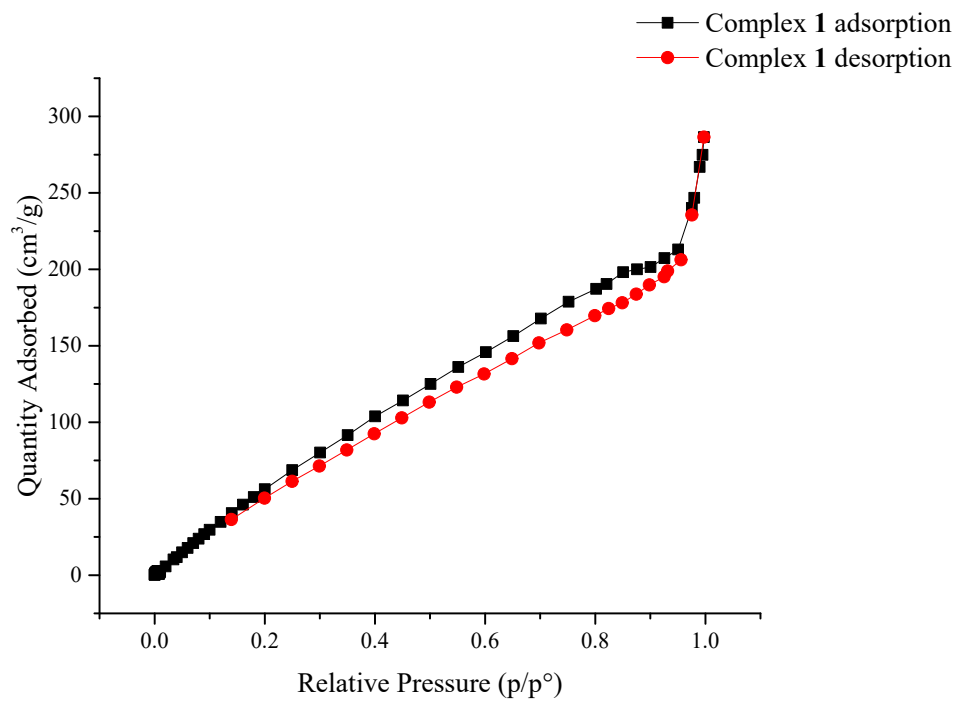

**Fig. S41.** Pore-size distribution curve for complex 1.

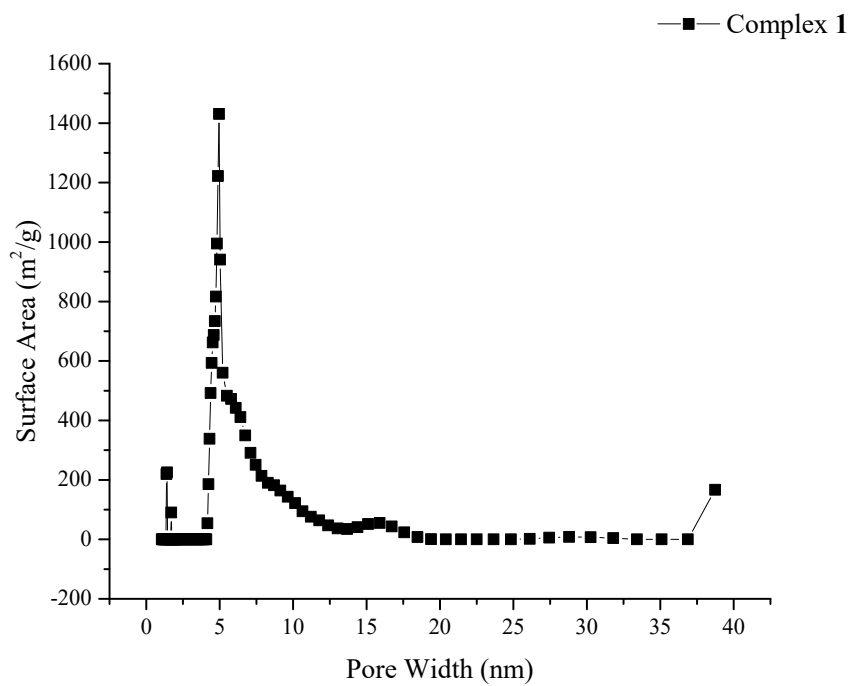

**Fig. S42.** N<sub>2</sub> adsorption-desorption isotherms for complex 2.

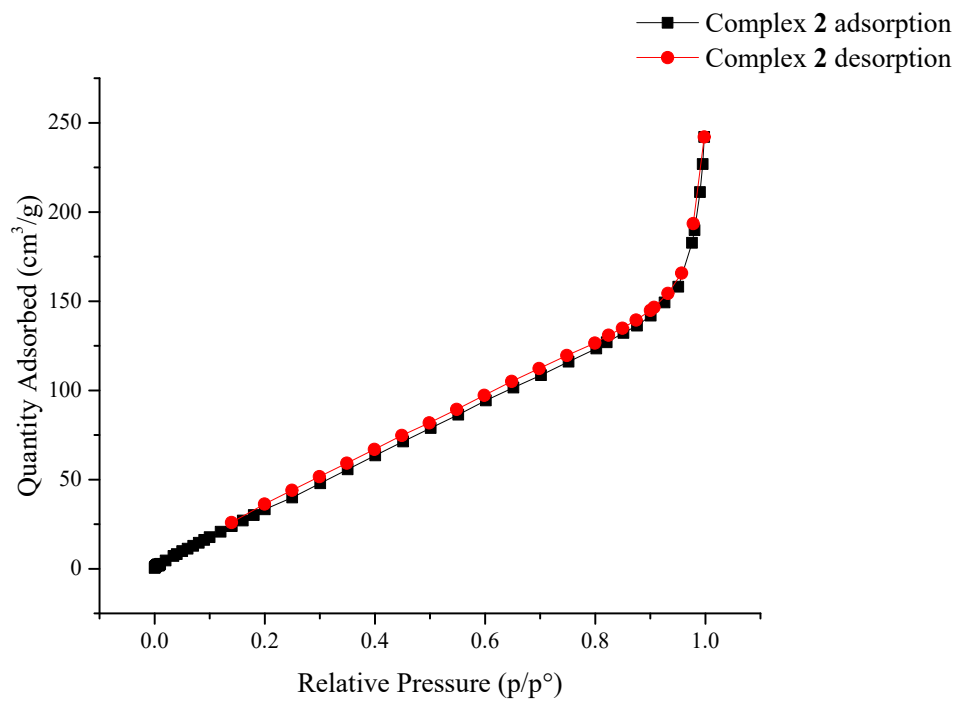

**Fig. S43.** Pore-size distribution curve for complex 2.

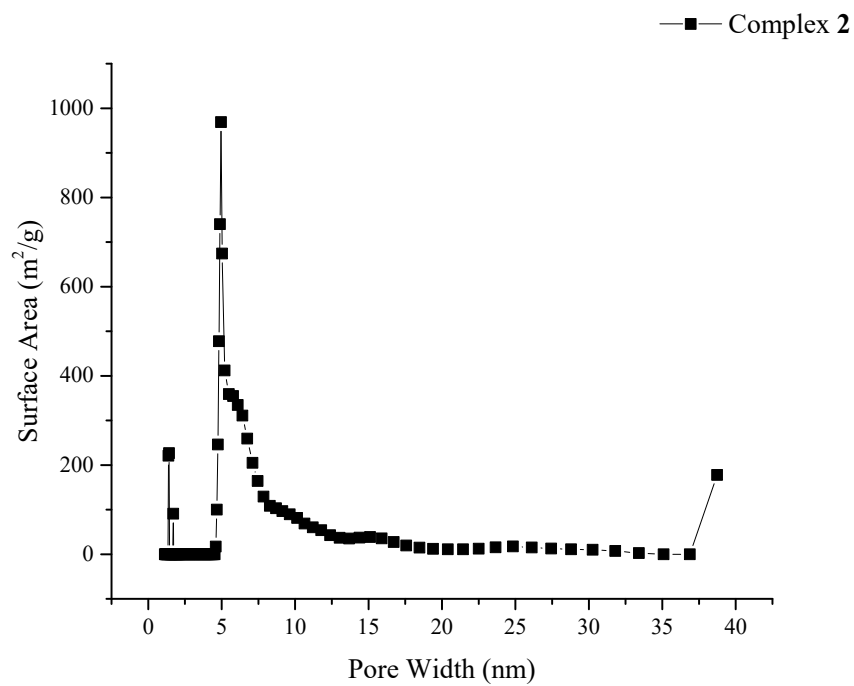

**Fig. S44.**  $\text{N}_2$  adsorption-desorption isotherms for complex 3.

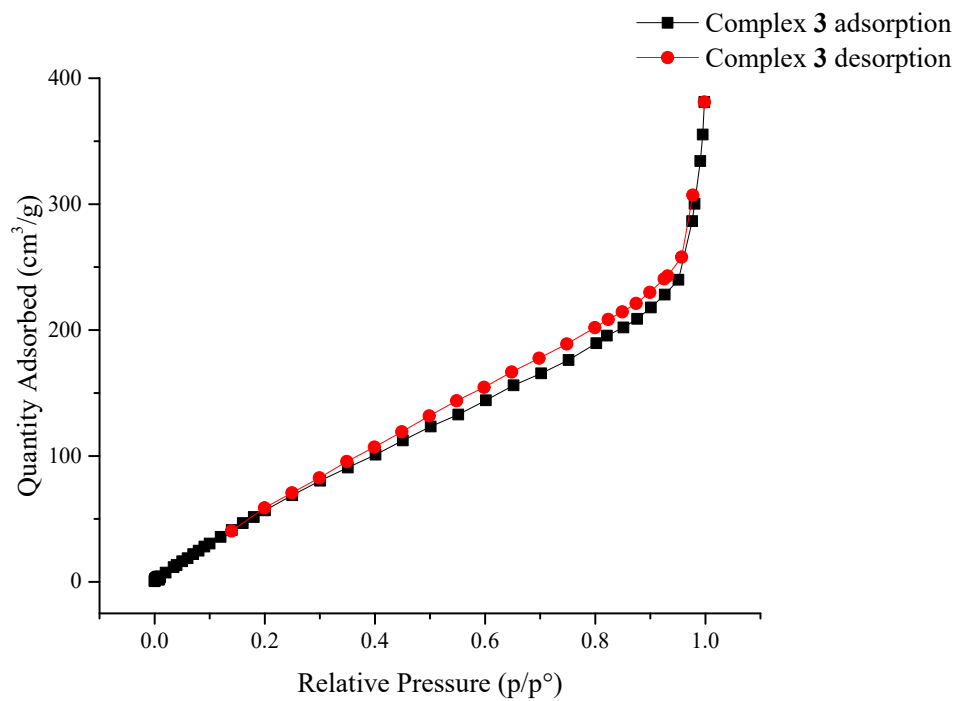

**Fig. S45.** Pore-size distribution curve for complex 3.

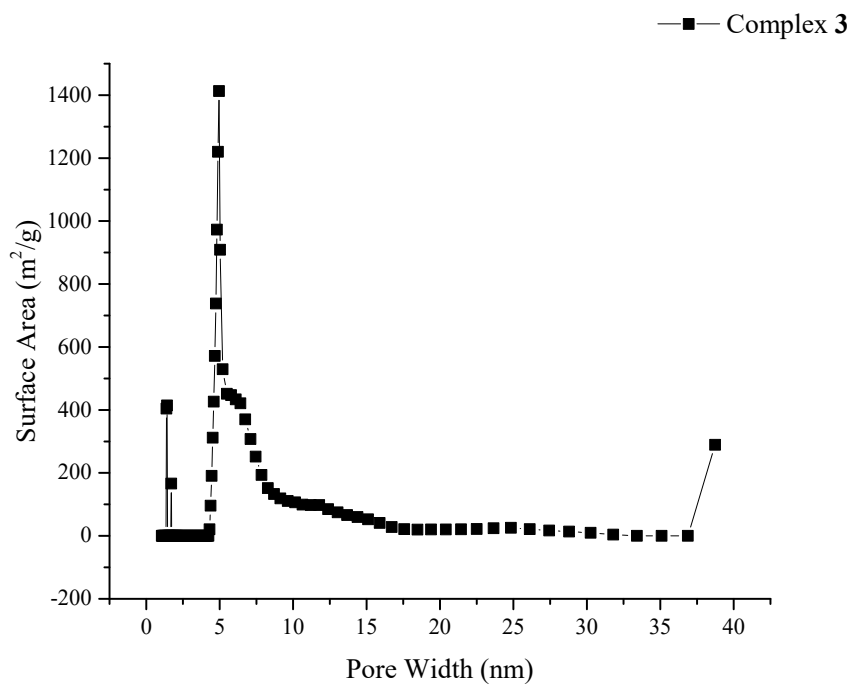

**Fig. S46.** N<sub>2</sub> adsorption-desorption isotherms for complex 6.

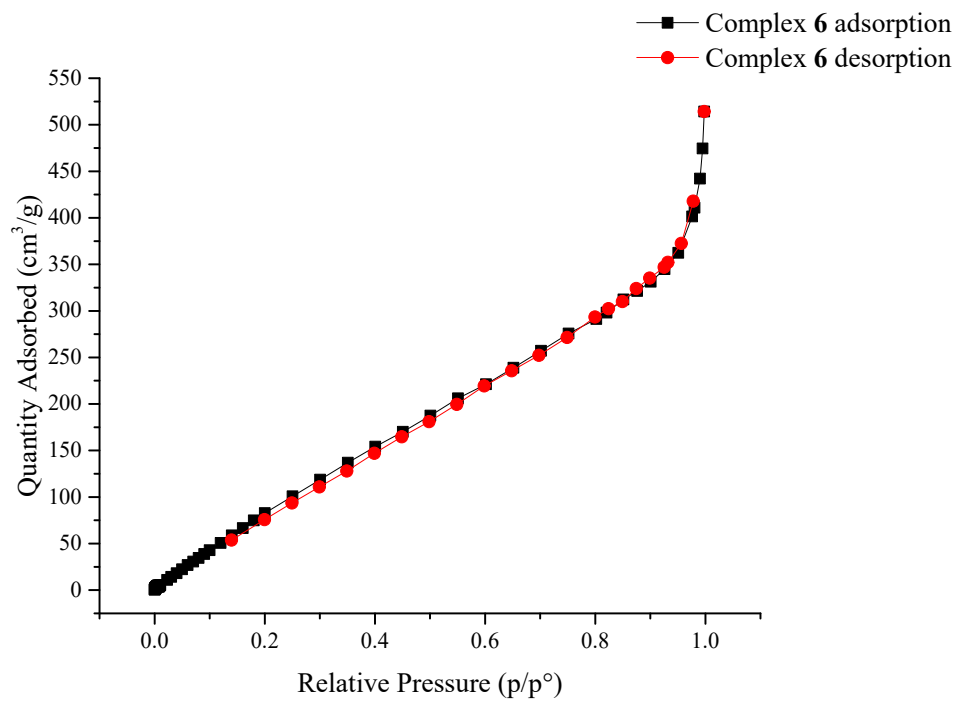

**Fig. S47.** Pore-size distribution curve for complex 6.

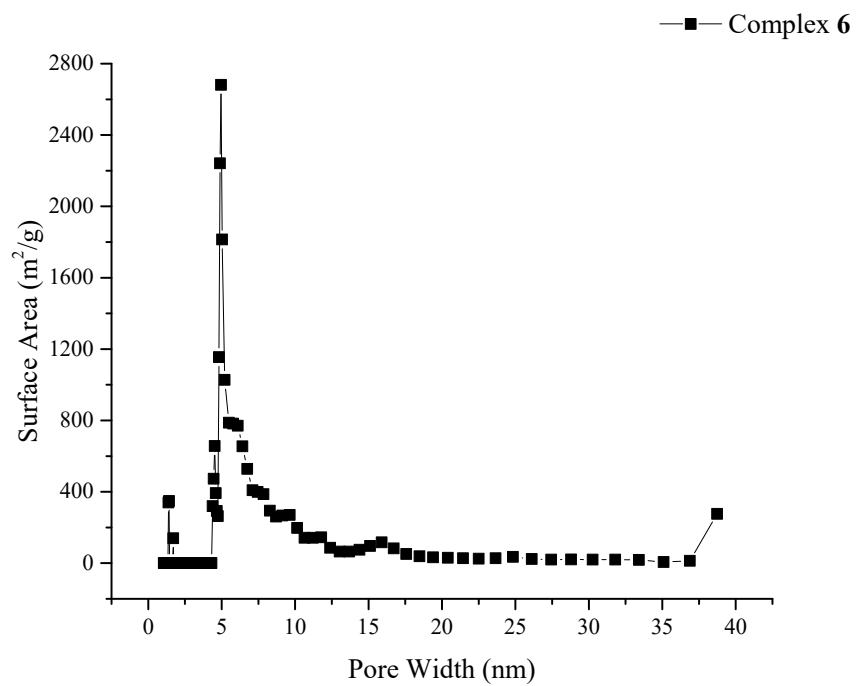

**Fig. S48.** N<sub>2</sub> adsorption-desorption isotherms for complex 7.

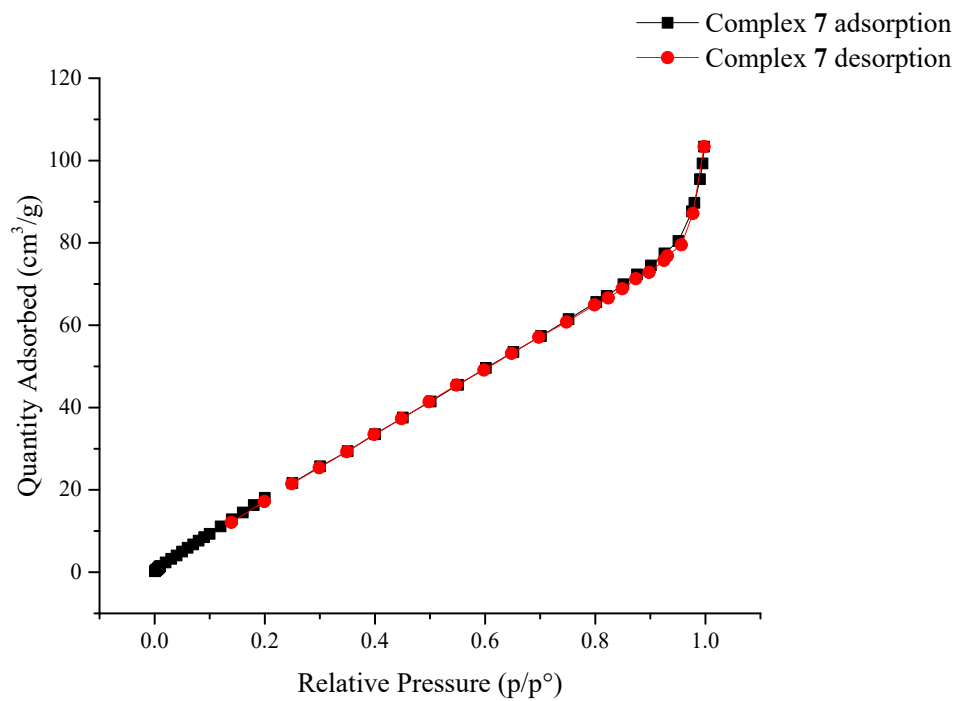

**Fig. S49.** Pore-size distribution curve for complex 7.

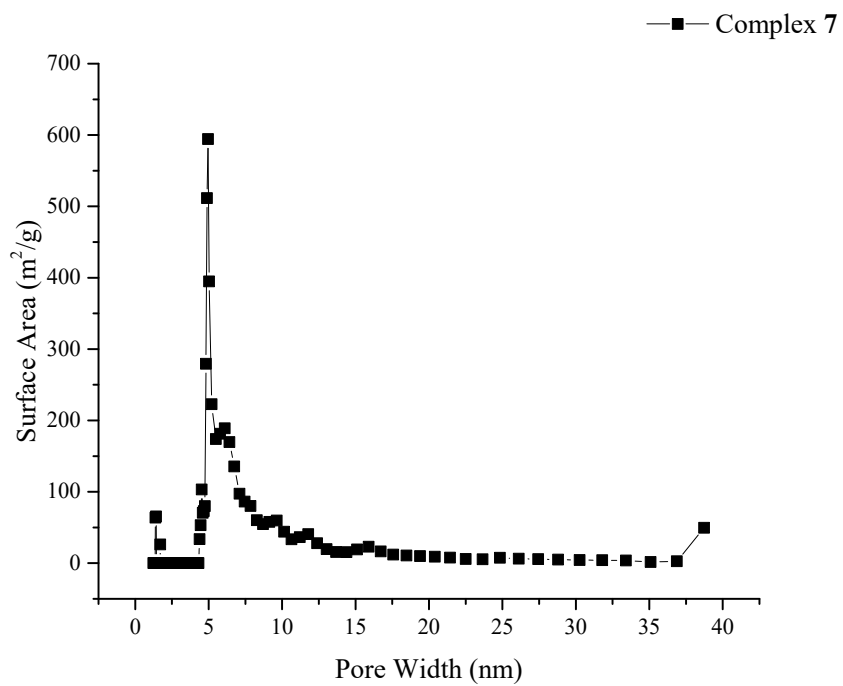

Supplement: d4ce01119h1.pdf [file d4ce01119h1.pdf]
